# Supplementary material
Source: publisher figshare collection journal article supplement (https://gsajournals.figshare.com/ndownloader/files/15090287)
Supplement: Supplementary file 1 [file 15090287]

## Sheet: Sheet1
File S13. List of differentially expressed putative secondary metabolite genes in ve-1 mutant in both conditions
SM Cluster	GENE_ID	WT vs VE1 Standard	WT vs VE1 Fe Free
1	NCU00054	0	0		Upregulated
1	NCU00055	0	0		No Change
1	NCU00056	0	0		Downregulated
1	NCU10763	0	0
2	NCU02918	-2.63758	-4.82985
2	NCU02919	0	-7.52288
2	NCU02920	0	-5.69588
2	NCU02921	0	-4.35048
2	NCU02922	0	0
2	NCU02923	0	0
2	NCU02924	0	0
2	NCU02925	0	0
2	NCU02926	0	0
2	NCU02927	0	0
2	NCU02928	0	0
2	NCU02929	0	0
2	NCU02930	0	0
2	NCU02931	0	-2.34848
2	NCU02932	0	-2.4476
2	NCU02933	0	0
2	NCU02934	1.11435	0
3	NCU04531	0	-1.01751
3	NCU04532	0	-3.2872
3	NCU04533	0	-5.4991
3	NCU04534	0	0
3	NCU04535	0	0
3	NCU04536	0	0
3	NCU04537	1.79289	7.33808
3	NCU10145	0	0
3	NCU10525	0	0
4	NCU04865	2.57434	1.70357
4	NCU04866	0	2.78432
5	NCU06011	0	0
5	NCU06012	0	0
5	NCU06013	0	0
6	NCU07119	1.23933	0
6	NCU07120	0	0
6	NCU07121	-3.09869	-3.35514
6	NCU07122	0	0
6	NCU07123	-2.14768	0
6	NCU07124	0	-3.57614
6	NCU07125	0	0
6	NCU07126	-1.18056	0
6	NCU07127	0	1.8365
6	NCU07128	0	0
6	NCU07129	-5.35247	-3.58014
7	NCU08399	1.01595	0
7	NCU08400	0	0
7	NCU08401	0	0
7	NCU10133	0	0
7	NCU10164	0	0
7	NCU10272	0	0
7	NCU10283	0	0
7	NCU10296	0	0
7	NCU10368	0	0
7	NCU10383	0	0
7	NCU10423	0	0
7	NCU10574	0	0
7	NCU10650	0	0
7	NCU10833	0	0
7	NCU10866	0	0
8	NCU08402	1.96247	0
8	NCU08403	0	0
8	NCU08404	3.65307	0
8	NCU08405	0	0
8	NCU08406	0	0
8	NCU08407	-1.54454	0
8	NCU08408	0	0
8	NCU08409	0	0
8	NCU08410	0	1.38668
8	NCU08411	-1.18216	0
8	NCU10330	0	0
9	NCU08428	1.75875	0
9	NCU08429	0	0
9	NCU08430	0	0
9	NCU08431	0	0
9	NCU08432	-2.20093	0
9	NCU08433	-2.45323	-3.6979
9	NCU08434	0	0
9	NCU08435	-2.25988	-2.32724
9	NCU08436	0	0
9	NCU08437	0	0
9	NCU08438	0	0
9	NCU08439	0	0
9	NCU08440	-1.22215	0
9	NCU08441	0	0
9	NCU08442	0	0
9	NCU08443	-2.47036	-1.3394
10	NCU09635	0	-3.48755
10	NCU09636	0	-3.40668
10	NCU09637	0	-2.44839
10	NCU09638	0	0
10	NCU09639	-2.53897	-4.1565
10	NCU09640	0	0
